# Supplementary material for: Industry-oriented method for the aqueous phase oxidation of crude 5-hydroxymethyl furfural (HMF) to 2,5-furandicarboxylic acid (FDCA)
Source: Royal Society of Chemistry journal article supplement (doi:10.1039/d3nj01834b), 2023-01-01
Supplement: d3nj01834b1.pdf [file d3nj01834b1.pdf]

## Supporting Information

### **Industrially oriented method for the aqueous phase oxidation of crude 5-hydroxymethyl furfural (HMF) to 2,5-furandicarboxylic acid (FDCA)**

Priya Lokhande,<sup>#ab</sup> Kalyani Sonone<sup>#a</sup> and Dr. Paresh L. Dhepe<sup>\*ab</sup>

<sup>a</sup>Catalysis and Inorganic Chemistry Division, CSIR-National Chemical Laboratory, Dr. Homi Bhabha Road, Pune 411008, India.

<sup>b</sup>Academy of Scientific and Innovative Research (AcSIR), Ghaziabad- 201002, India

<sup>#</sup>Equal author contribution

<sup>\*</sup>Corresponding author

E-mail: pl.dhepe@ncl.res.in; Tel: +91 20 25902024.

**Table S1:** Summary on the non-noble metal catalysts for the oxidation of HMF to FDCA

| Entry | Name of the catalyst                                                   | Reaction Conditions                                                                                                             | FDCA Yield (%) | HMF conversion (%) | References |
|-------|------------------------------------------------------------------------|---------------------------------------------------------------------------------------------------------------------------------|----------------|--------------------|------------|
| 1     | Fe-POP                                                                 | 10 bar O <sub>2</sub> , 100°C, 10h,                                                                                             | 79             | 100                | 1          |
| 2     | Fe <sub>3</sub> O <sub>4</sub> -CoO <sub>x</sub>                       | t-BuOOH, 80°C, 12h                                                                                                              | 68.6           | 97.2               | 2          |
| 3     | Fe <sub>0.6</sub> Zr <sub>0.4</sub> O <sub>2</sub>                     | (Bmim)Cl, 20 bar O <sub>2</sub> , 160°C, 24h,                                                                                   | 60.6           | 99.7               | 3          |
| 4     | Ce <sub>0.5</sub> Fe <sub>0.15</sub> Zr <sub>0.35</sub> O <sub>2</sub> | (Bmim)Cl, 20 bar O <sub>2</sub> , 140°C, 24h                                                                                    | 44.2           | 99.9               | 4          |
| 5     | MnO <sub>2</sub>                                                       | NaHCO <sub>3</sub> , 10 bar O <sub>2</sub> , 100°C, 24h                                                                         | 91             | 99                 | 5          |
| 6     | MOF-Mn <sub>2</sub> O <sub>3</sub>                                     | NaHCO <sub>3</sub> , 14 bar O <sub>2</sub> , 100°C, 24h                                                                         | 99.5           | 100                | 6          |
| 7     | MnO <sub>x</sub> -CeO <sub>2</sub>                                     | KHCO <sub>3</sub> , 20 bar O <sub>2</sub> , 110°C, 15h                                                                          | 91             | 98                 | 7          |
| 8     | MnCO <sub>2</sub> O <sub>4</sub>                                       | KHCO <sub>3</sub> , 20 bar O <sub>2</sub> , 100°C, 24h                                                                          | 70.9           | 99.5               | 8          |
| 9     | Co <sub>3</sub> O <sub>4</sub> /Mn <sub>x</sub> Co                     | Base free, 14 bar O <sub>2</sub> , 140°C, 24h                                                                                   | 99             | 100                | 9          |
| 10    | NNC-1173                                                               | K <sub>2</sub> CO <sub>3</sub> , 1 bar O <sub>2</sub> , 80°C, 48h                                                               | 80             | 100                | 10         |
| 11    | Co-Mn <sub>0.25</sub>                                                  | NaHCO <sub>3</sub> , 10 bar O <sub>2</sub> , 120°C, 5h                                                                          | 95             | 99                 | 11         |
| 12    | Co/Mn/Br                                                               | 1/0.015/0.5 molar ratio of Co, Mn, and Br, 7% (v/v) water, 30 bar (CO <sub>2</sub> /O <sub>2</sub> = 1/1, mol/mol), 180°C, 0.5h | 90             | 99                 | 12         |
| 13    | Mn <sub>x</sub> Fe <sub>y</sub>                                        | NaOH, 8 bar O <sub>2</sub> , 90°C, 24h                                                                                          | 30             | 93                 | 13         |
| 14    | Li <sub>2</sub> CoMn <sub>3</sub> O <sub>8</sub>                       | NaOH, NaBr, Acetic acid, water, 55 bar O <sub>2</sub> , 150°C, 8h                                                               | 85             | 100                | 14         |
| 15    | CuCl                                                                   | t-BuOOH, MeCN, TEMPO, RT, 48h                                                                                                   | 45             | 100                | 15         |

## Catalyst characterization

### X-ray diffraction study (XRD)

In Figure 1. traces of CuO were also detected in the XRD pattern. Peaks for MnO<sub>x</sub>, along with Mn<sub>3</sub>O<sub>4</sub> also have some contribution.

Mn<sub>2</sub>O<sub>3</sub> (Cubic), 2θ = 18°, 33.5°, 36°, 41°, 54°

MnO<sub>2</sub> (00-050-0866) and Mn<sub>2</sub>O<sub>3</sub> (00-001-1061)

CuO (00-045-0937 and 00-003-0884) Cu<sub>1.5</sub>Mn<sub>1.5</sub>O<sub>4</sub> (00-035-1171)

Cu<sub>2</sub>O plain 110 (30°), 111 (36°), 200 (43°), 211 (53°), 220 (61°), (JCPDS 01-071-3645 and 05-0667)

**Table S2:** Summary of the results obtained by using different mixed metal oxides on crude HMF (80-90%) oxidation

| Sr. No. | Catalyst (M:M' mol ratio) | Temp. (°C) | Time (h) | Press.O <sub>2</sub> (bar) | FDCA Sel. (%) | HMF Conv. (%) |
|---------|---------------------------|------------|----------|----------------------------|---------------|---------------|
| 1       | Without catalyst          | 120        | 6        | 10                         | 4             | 90            |
| 2       | Co-Mn (1:4)               | 120        | 4        | 10                         | 65            | 100           |
| 3       | Co-Mn-Ce (1:4:1)          | 120        | 4        | 10                         | 30            | 78            |
| 4       |                           |            | 6        |                            | 53            | 96            |
| 5       |                           |            | 8        |                            | 52            | 98            |
| 6       | Co-Mn-Ce (1:4:0.25)       | 120        | 4        | 10                         | 67            | 95            |
| 7       |                           |            | 6        |                            | 75            | 100           |
| 8       |                           | 140        | 6        | 6                          | 80            | 100           |
| 9       | Co-Mn-Fe (1:4:1)          | 120        | 4        | 10                         | 68            | 95            |
| 10      |                           |            | 8        | 15                         | 78            | 98            |
| 11      | Co-Mn-Fe-Zr (1:4:0.5:0.5) | 120        | 4        | 10                         | 62            | 95            |
| 12      |                           |            | 8        |                            | 67            | 97            |
| 13      | Cu-Mn (1:4)               | 120        | 4        | 10                         | 75            | 92            |
| 14      |                           |            | 8        | 15                         | 90            | 100           |
| 15      | Co-Mn-Zr (1:4:1)          | 120        | 8        | 10                         | 68            | 100           |
| 16      |                           | 140        | 6        | 12                         | 73            | 100           |

|    |                                        |     |    |    |     |     |
|----|----------------------------------------|-----|----|----|-----|-----|
| 17 | Mn-Fe-Cu (4:1:1)                       | 120 | 6  | 10 | 19  | 97  |
| 18 | Mn-Fe-Ce<br>(4:1:0.25)                 | 140 | 6  | 6  | 54  | 96  |
| 19 | Co-Cu-Mn (1:1:4)                       | 120 | 10 | 10 | 42  | 100 |
| 20 | Co-Mn-V (1:4:1)                        | 120 | 6  | 10 | 2   | 53  |
| 21 | Co-Cu-Mn-Ce<br>(1:1:4:0.25)            | 120 | 6  | 10 | 60  | 92  |
| 22 | Co-Cu-Mn-<br>Fe(1:1:4:1)               |     |    |    | 62  | 95  |
| 23 | Co-Mn/HT                               |     |    |    | 52  | 92  |
| 24 | Co-Mn-Ce/HT                            |     |    |    | 59  | 96  |
| 25 | Cu-Mn-Ce<br>(1:4:0.25)                 |     |    |    | 49  | 88  |
| 26 | Cu-Mn-Fe-<br>Zr(1:4:1:1)               |     |    |    | 54  | 93  |
| 27 | Ru/Co-Mn (1:4)                         | 120 | 6  | 10 | 75  | 95  |
| 28 | Ru-Co-Mn-Ce<br>(1:4:0.25)              |     |    |    | 85  | 100 |
| 29 | Ru-Cu-Mn (1:4)                         |     |    |    | 83  | 100 |
| 30 | #Ru/Carbon                             |     |    |    | 93  | 100 |
| 31 | Ru-Co-Mn-Ce/C<br>(1:4:0.25)            |     |    |    | 4   | 90  |
| 32 | Co/NG                                  | 120 | 8  | 35 | 98  |     |
| 33 | CuO <sub>x</sub> /MC                   | 120 | 6  | 45 | 100 |     |
| 34 | MnO <sub>x</sub> -CoO <sub>x</sub> /MC | 120 | 6  | 35 | 100 |     |
| 35 | CuMn/NG                                | 120 | 8  | 53 | 100 |     |

\*Reaction condition: 0.5wt% Solution of crude HMF (Purity 80-90%), Catalyst (0.5 g), Water (30mL), Base (Na<sub>2</sub>CO<sub>3</sub>: 0.15 g). (MC= Mesoporous carbon, NG= Nitrogen-doped graphene)  
#0.25 g catalyst. *Note: When a solid base is used in the reaction, homogeneous base is not used.*

## Product analysis and characterization

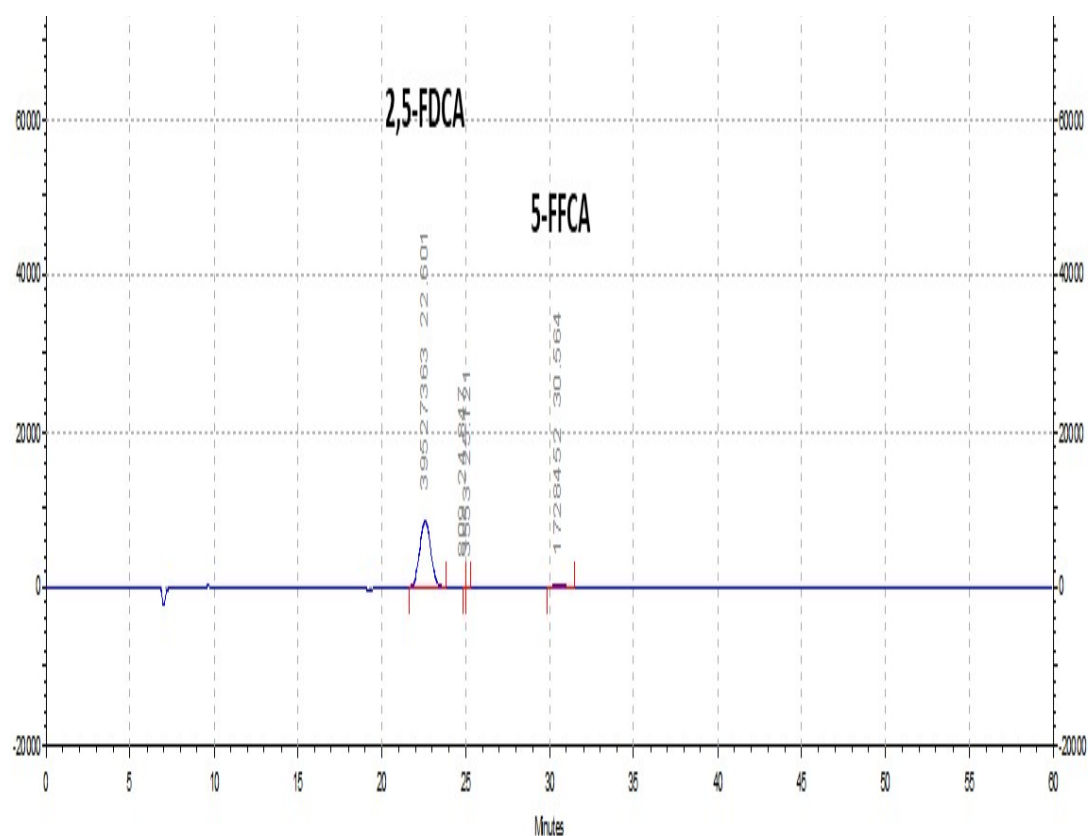

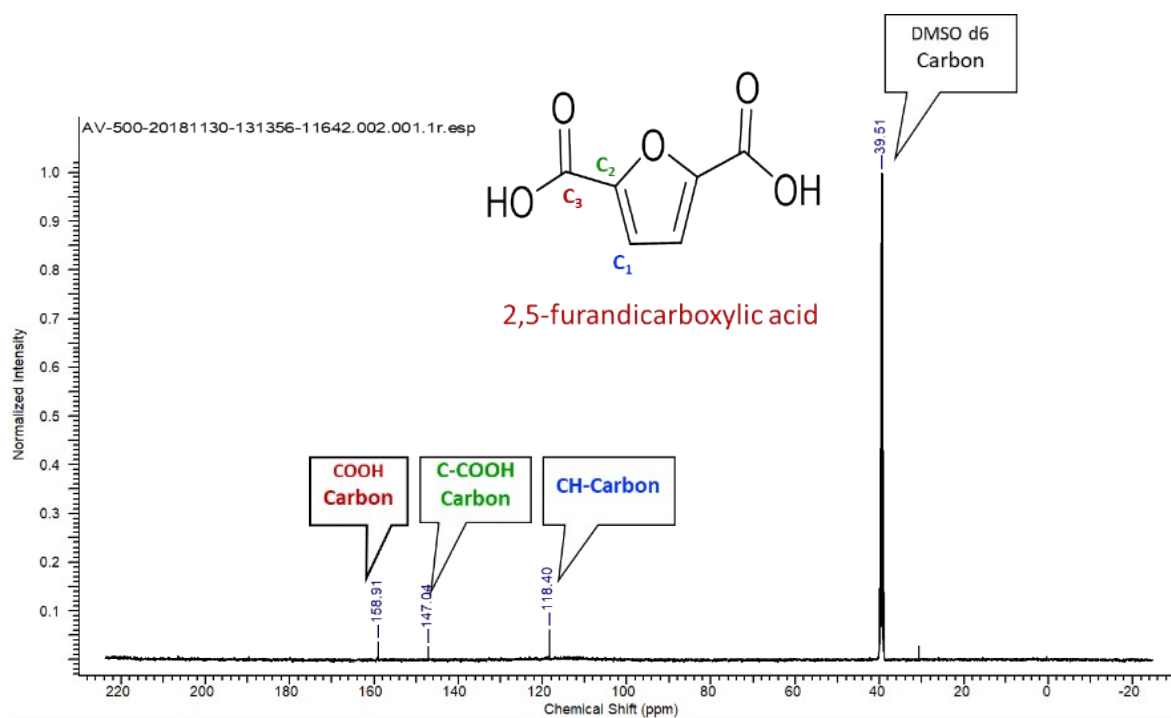

**Figure S3.**  $^{13}\text{C}$  NMR spectrum of isolated FDCA obtained after the reaction. Solvent: DMSO

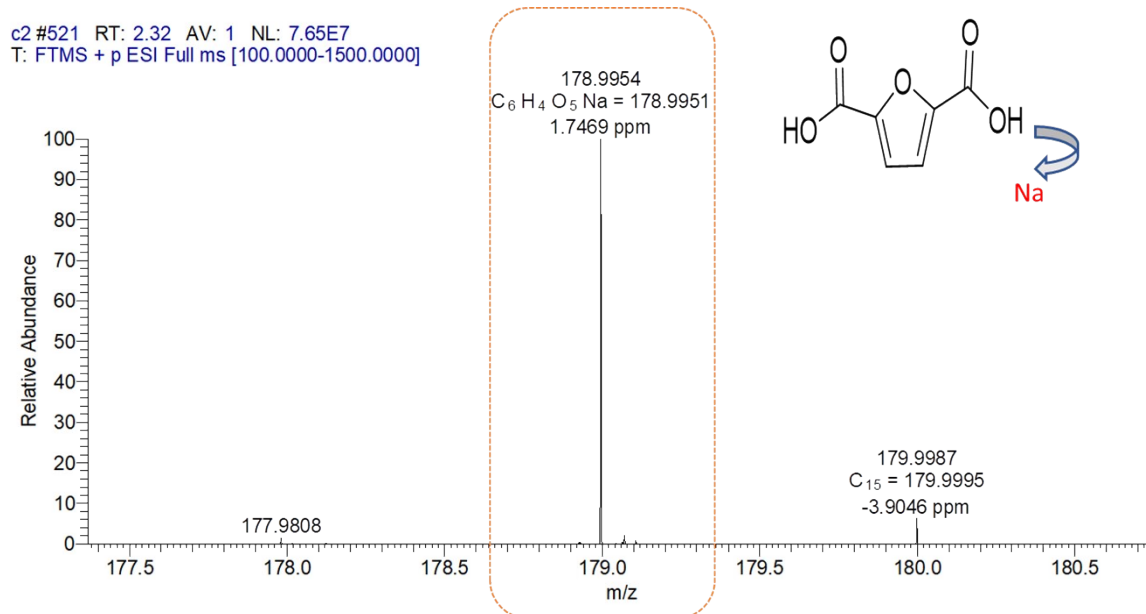

**Figure S4.** HRMS spectra of isolated FDCA obtained after the reaction.

The peak at M/Z of 179 [M+Na] in the HR-MS profile confirmed the formation of Na salt of FDCA.

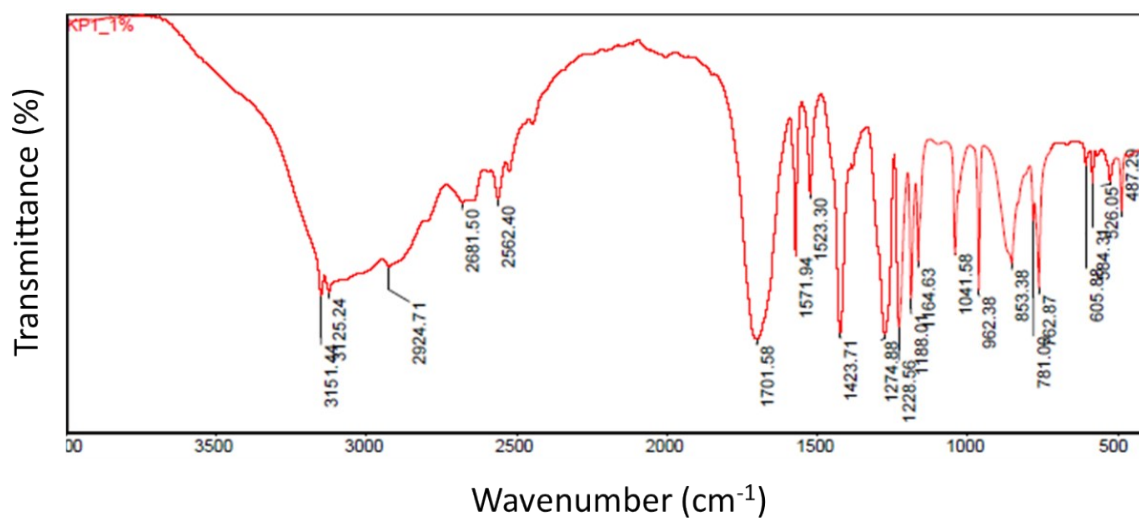

**Figure S5.** FTIR spectrum of isolated FDCA obtained after the reaction.

FTIR ( $\nu$   $\text{cm}^{-1}$ ) 3151, 3125 (-OH); 1701 (C=O); 1571, 1423 (Furan Ring -C=C-); 1274 (ester-C-O-), 1228 (furan ring -C-O); 962, 853, 762 (=CH).

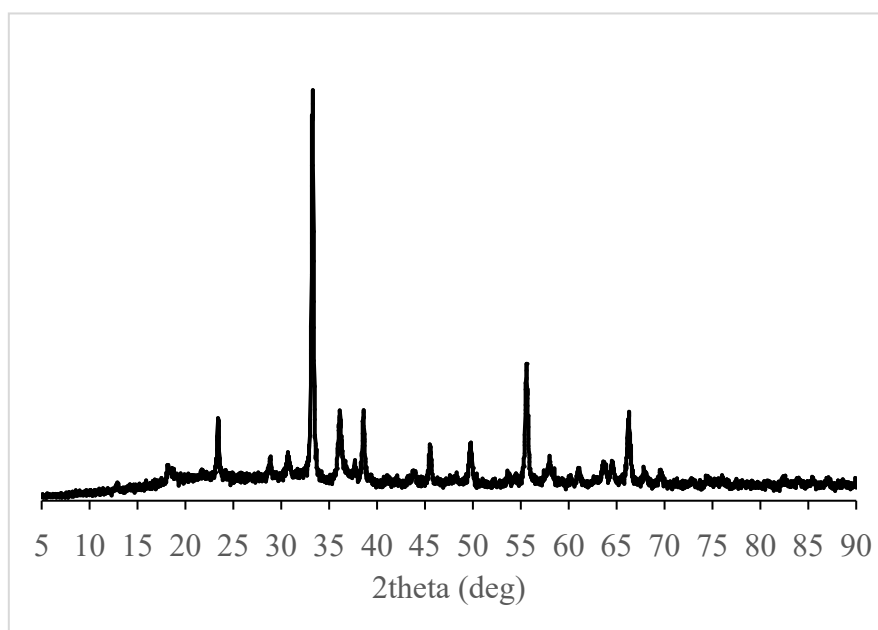

**Figure S6.** XRD of spent Cu-Mn Catalyst

## References

1. B. Saha, D. Gupta, M. M. Abu-Omar, A. Modak and A. Bhaumik, *Journal of Catalysis*, 2013, **299**, 316-320.
2. S. Wang, Z. Zhang and B. Liu, *ACS Sustainable Chemistry & Engineering*, 2015, **3**, 406-412.
3. D. Yan, G. Wang, K. Gao, X. Lu, J. Xin and S. Zhang, *Industrial & Engineering Chemistry Research*, 2018, **57**, 1851-1858.
4. D. Yan, J. Xin, C. Shi, X. Lu, L. Ni, G. Wang and S. Zhang, *Chemical Engineering Journal*, 2017, **323**, 473-482.
5. E. Hayashi, T. Komanoya, K. Kamata and M. Hara, *ChemSusChem*, 2017, **10**, 654-658.
6. L. Bao, F.-Z. Sun, G.-Y. Zhang and T.-L. Hu, *ChemSusChem*, 2020, **13**, 548-555.
7. X. Han, C. Li, X. Liu, Q. Xia and Y. Wang, *Green Chemistry*, 2017, **19**, 996-1004.
8. S. Zhang, X. Sun, Z. Zheng and L. Zhang, *Catalysis Communications*, 2018, **113**, 19-22.
9. T. Gao, Y. Yin, G. Zhu, Q. Cao and W. Fang, *Catalysis Today*, 2020, **355**, 252-262.
10. C. V. Nguyen, Y.-T. Liao, T.-C. Kang, J. E. Chen, T. Yoshikawa, Y. Nakasaka, T. Masuda and K. C. W. Wu, *Green Chemistry*, 2016, **18**, 5957-5961.
11. K. T. V. Rao, J. L. Rogers, S. Souzanchi, L. Dessbesell, M. B. Ray and C. Xu, *ChemSusChem*, 2018, **11**, 3323-3334.
12. X. Zuo, P. Venkitasubramanian, D. H. Busch and B. Subramaniam, *ACS Sustainable Chemistry & Engineering*, 2016, **4**, 3659-3668.
13. F. Neațu, R. S. Marin, M. Florea, N. Petrea, O. D. Pavel and V. I. Pârvulescu, *Applied Catalysis B: Environmental*, 2016, **180**, 751-757.
14. A. Jain, S. C. Jonnalagadda, K. V. Ramanujachary and A. Mugweru, *Catalysis Communications*, 2015, **58**, 179-182.
15. T. S. Hansen, I. Sádaba, E. J. García-Suárez and A. Riisager, *Applied Catalysis A: General*, 2013, **456**, 44-50.
